# Supplementary material
Source: Springer Nature journal article supplement (https://www.springermedizin.de/resource/supplementary/12876_2009_446_MOESM7_ESM.pdf/9437032)
Supplement: MOESM7 [file 9437032]

## Gastric phenotype

- p53 (+)
- Cyclin A ↑
- High proliferative activity
- Nuclear grade high

## Intestinal phenotype

- p27 ↑
- Cyclin A ↓
- Low proliferative activity

## Common alteration

- p21 ↓
- B catenin (+)

## Mixed phenotype

- Cyclin A ↑
- High proliferative activity
